# Supplementary material
Source: ML conference proceedings conference paper supplement (https://proceedings.mlr.press/v28/goerg13.html)
Supplement: Supplementary file 1 [file goerg13-supp.pdf]

**APPENDIX – SUPPLEMENTARY  
MATERIAL**

**A. Proofs**

*Proof of Properties 3.2c (Max-subadditivity).*

Consider the linear combination of two stationary processes  $x_t$  and  $y_t$ ,

$$z_t = \alpha x_t + \beta y_t$$

It holds  $\mathbb{V}z_t = \alpha^2\sigma_x^2 + \beta^2\sigma_y^2 + 2\alpha\beta\text{cov}(x_t, y_t)$ . If  $x_t$  and  $y_s$  are uncorrelated for all  $s \neq t$  then  $\mathbb{V}z_t = \alpha^2 + \beta^2$  (if  $x_t$  and  $y_t$  are both unit-variance processes). To have a unit-variance sum we need  $\beta = \sqrt{1 - \alpha^2}$ :

The spectrum of  $z_t$  equals (if they are uncorrelated)

$$S_z(\lambda) = \alpha^2 S_x(\lambda) + \beta^2 S_y(\lambda) \leq \alpha S_x(\lambda) + \beta S_y(\lambda) \quad (29)$$

It therefore holds

$$\begin{aligned} \Omega(z_t) &= \Omega(\alpha x_t + \beta y_t) \\ &= 1 - H(\alpha^2 S_x(\lambda) + \beta^2 S_y(\lambda)) \\ &\leq 1 - (\alpha^2 H(S_x(\lambda)) + \beta^2 H(S_y(\lambda))), \end{aligned}$$

where the last inequality follows by (29). Plugging in  $\beta = \sqrt{1 - \alpha^2}$  gives

$$\begin{aligned} &\alpha^2 - \alpha^2 H(S_x(\lambda)) + (1 - \alpha^2) - (1 - \alpha^2) H(S_y(\lambda)) \\ &= \alpha^2(1 - H(S_x(\lambda))) + (1 - \alpha^2)(1 - H(S_y(\lambda))) \\ &= \alpha^2 \Omega(x_t) + (1 - \alpha^2) \Omega(y_t) \\ &\leq \max(\Omega(x_t), \Omega(y_t)), \end{aligned}$$

which completes the proof. □

*Proof of Proposition 4.1.* For every  $\mathbf{w}$ ,

$$\begin{aligned} \mathbf{w}^\top \widehat{S}_U^{(i)} \mathbf{w} &= -\frac{1}{T} \sum_{j=0}^{T-1} \mathbf{w}^\top \left[ \widehat{S}_U(\omega_j) \cdot \ell(\mathbf{w}_i; \omega_j) \right] \mathbf{w} \\ &= \frac{1}{T} \sum_{j=0}^{T-1} \underbrace{-\ell(\mathbf{w}_i; \omega_j)}_{\geq 0} \cdot \underbrace{\mathbf{w}^\top \widehat{S}_U(\omega_j) \mathbf{w}}_{\geq 0} \geq 0. \end{aligned}$$

□
